# Supplementary material for: Efficacy and safety evaluation of Azvudine in the prospective treatment of COVID-19 based on four phase III clinical trials
Source: PubMed Central journal article supplement (PMC10484631; doi:10.3389/fphar.2023.1228548), 2023-08-24

## *Supplementary Material*

# **Efficacy and safety evaluation of Azvudine in the treatment of COVID-19 based on four phase III clinical trials.**

**Ke-Wei Zhu\***

\* **Correspondence:** Ke-Wei Zhu: zhukew2018@outlook.com

## **1 Supplementary Figures and Tables**

### **1.1 Supplementary Figures**

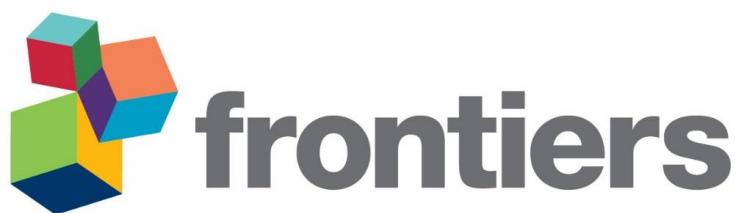

**Supplementary Figure S1. Chemical structure of Azvudine.**

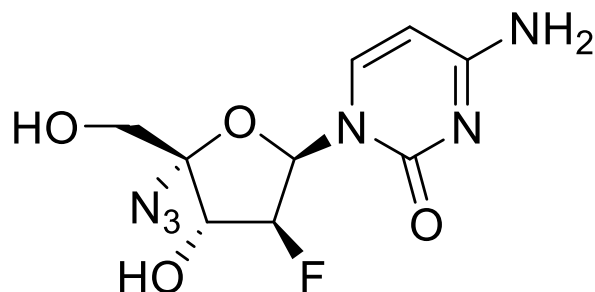

Supplement: DataSheet1.pdf [file DataSheet1.pdf]
